# Supplementary material for: Perception of Malaria Chemoprevention Interventions in Infants and Children in Eight Sub-Saharan African Countries: An End User Perspective Study
Source: MDPI journal article supplement (doi:10.3390/tropicalmed6020075), 2021-05-11
Supplement: s1 [file s1]

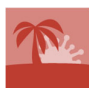

## Supplementary Material

**Table S1.** Sample composition Health Center Managers.

|                                | Cameroon | DRC    | Ghana | Nigeria | Senegal | Sierra Leone | Tanzania | Uganda | Total  |
|--------------------------------|----------|--------|-------|---------|---------|--------------|----------|--------|--------|
|                                | n = 8    | n = 16 | n = 8 | n = 13  | n = 8   | n = 15       | n = 15   | n = 11 | n = 94 |
| Practice setting               |          |        |       |         |         |              |          |        |        |
| Public                         | 100%     | 44%    | 100%  | 100%    | 50%     | 93%          | 67%      | 55%    | 79%    |
| Private                        | 0%       | 56%    | 0%    | 0%      | 50%     | 7%           | 33%      | 45%    | 21%    |
| Specialty                      |          |        |       |         |         |              |          |        |        |
| Nurse/mid wife                 | 75%      | 6%     | 50%   | 23%     | 100%    | 33%          | 20%      | 91%    | 39%    |
| Physician/ BSc                 | 13%      | 94%    | 50%   | 69%     | 0%      | 0%           | 80%      | 9%     | 38%    |
| CHW/CH EW                      | 0%       | 0%     | 0%    | 0%      | 0%      | 67%          | 0%       | 0%     | 20%    |
| NA                             | 13%      | 0%     | 0%    | 8%      | 0%      | 0%           | 0%       | 0%     | 2%     |
| Professional experience        |          |        |       |         |         |              |          |        |        |
| Average of years in position   | 7        | 8      | 4     | 5       | 5       | 3            | 3        | 5      | 5      |
| Average of years of experience | 16       | 13     | 12    | 21      | 12      | 12           | 6        | 12     | 13     |

**Table S2.** Sample composition Community Health Workers.

|                                                                | Cameroon | Ghana  | Nigeria | Senegal | Total  |
|----------------------------------------------------------------|----------|--------|---------|---------|--------|
|                                                                | n = 10   | n = 10 | n = 16  | n = 10  | n = 46 |
| Professional experience                                        |          |        |         |         |        |
| Average number of years as CHWs                                | 8.8      | 6.0    | 5.0     | 11.6    | 7.6    |
| Catchment area                                                 |          |        |         |         |        |
| Average number of children under 5 years of age % of household | 660.3    | 265.4  | 1174.5  | 2750.0  | 976.2  |
| with 0-5y that also have 5-10y children                        | 81%      | 58%    | 65%     | NA      | 68%    |

**Table S3.** Sample composition Parents.

|                                  | Cameroon | Ghana | Nigeria | Senegal | Sierra Leone | Total  |
|----------------------------------|----------|-------|---------|---------|--------------|--------|
|                                  | n = 5    | n = 5 | n = 5   | n = 5   | n = 5        | n = 25 |
| Parent's relationship with child |          |       |         |         |              |        |
| Mother                           | 4        | 4     | 4       | 3       | 4            | 19     |
| Father                           |          | 1     |         |         |              | 1      |
| Mother and Father                |          |       | 1       |         | 1            | 2      |
| Grand Mother                     |          |       |         | 1       |              | 1      |
| Grand Father                     |          |       |         | 1       |              | 1      |
| Unspecified                      | 1        |       |         |         |              | 1      |
| Family composition               |          |       |         |         |              |        |
| Average number of children       | 3.6      | 3     | 4.6     | 3.4     | 2            | 3.3    |

|                                                                |    |    |    |    |    |    |
|----------------------------------------------------------------|----|----|----|----|----|----|
| Number of children eligible for SMC at the time of the survey  | 8  | 8  | 9  | 7  | NA | 32 |
| Number of children eligible for IPTi at the time of the survey | NA | NA | NA | NA | 5  | 5  |

---
